# Supplementary material for: Charge-compensated co-doping stabilizes robust hafnium oxide ferroelectricity
Source: Royal Society of Chemistry journal article supplement (doi:10.1039/d4tc00281d), 2024-01-01
Supplement: d4tc00281d1.pdf [file d4tc00281d1.pdf]

## Supplementary Information

### Charge-compensated co-doping stabilizes robust hafnium oxide ferroelectricity

Gang Li,<sup>1,2</sup> Yulin Liu,<sup>3</sup> Shaoan Yan,<sup>2</sup> Ningjie Ma,<sup>3</sup> Yongguang Xiao,<sup>3</sup> Minghua  
Tang,<sup>3,\*</sup> Zhilin Long<sup>1,\*</sup>

<sup>1</sup>College of Civil Engineering, Xiangtan University, Xiangtan 411105, China

<sup>2</sup>School of Mechanical Engineering and Mechanics, Xiangtan University, Xiangtan 411105,  
China

<sup>3</sup>School of Materials Science and Engineering, Xiangtan University, Xiangtan 411105, China

Email: [tangminghua@xtu.edu.cn](mailto:tangminghua@xtu.edu.cn), [longzl@xtu.edu.cn](mailto:longzl@xtu.edu.cn)

#### 1. Crystal structure modelling and dopant atom characterization

**Tab. S1** Lattice parameters (in Å) of the bulk phases of HfO<sub>2</sub> compared with previous theory computational studies and experiment. For the monoclinic (m) phase,  $\alpha$  is the angle between  $a$  and  $c$ , which is the only non-perpendicular angle for this phase.

| Phase                    | Lattice parameters | Our work         | Theory <sup>1</sup> | Experiment                    |
|--------------------------|--------------------|------------------|---------------------|-------------------------------|
| P4 <sub>2</sub> /nmc (t) | $a, c$ (Å)         | 5.03, 5.13       | 5.07, 5.19          | 5.06, 5.20 <sup>2</sup>       |
| P2 <sub>1</sub> /c (m)   | $a, b, c$ (Å)      | 5.08, 5.16, 5.18 | 5.11, 5.18, 5.30    | 5.07, 5.14, 5.29              |
|                          | $\alpha$           | 99.7°            | 99.6°               | 99.7° <sup>3</sup>            |
| Pca2 <sub>1</sub> (f)    | $a, b, c$ (Å)      | 5.21, 5.00, 5.03 | 5.25, 5.04, 5.07    | 5.24, 5.06, 5.07 <sup>4</sup> |

Tab. S2 Impact of dopant on the phase stability of HfO<sub>2</sub>, “↓” and “↑” mean the phase energy difference  $\Delta E^{f-m}/\Delta E^{t-m}$  lower and rise when dopant concentration increases, respectively. “-” means no data available. The subscripts “min” and “max” of the arrows indicate smaller and larger changes, respectively. The dopant concentration falls in the range of 0%–12.5%.

| Valence | Dopant | Phase (This work) |                  | Phase (Other)                 |                               |
|---------|--------|-------------------|------------------|-------------------------------|-------------------------------|
|         |        | f                 | t                | f                             | t                             |
| 2       | Mg     | ↓ <sub>max</sub>  | ↓ <sub>min</sub> | ↓ <sub>max</sub> <sup>5</sup> | ↓ <sub>min</sub> <sup>5</sup> |
|         | Ca     | ↓ <sub>max</sub>  | ↓ <sub>min</sub> | ↓ <sub>max</sub> <sup>5</sup> | ↓ <sub>min</sub> <sup>5</sup> |
|         | Sr     | ↓ <sub>max</sub>  | ↓ <sub>min</sub> | ↓ <sub>max</sub> <sup>5</sup> | ↓ <sub>min</sub> <sup>5</sup> |
| 3       | Al     | ↓ <sub>min</sub>  | ↓ <sub>max</sub> | ↓ <sub>min</sub> <sup>6</sup> | ↓ <sub>max</sub> <sup>6</sup> |
|         | Y      | ↓ <sub>max</sub>  | ↓ <sub>min</sub> | ↓ <sub>max</sub> <sup>6</sup> | ↓ <sub>max</sub> <sup>6</sup> |
|         | La     | ↓ <sub>max</sub>  | ↓ <sub>min</sub> | ↓ <sub>max</sub> <sup>6</sup> | ↓ <sub>min</sub> <sup>6</sup> |
|         | Gd     | ↓ <sub>max</sub>  | ↓ <sub>min</sub> | ↓ <sub>max</sub> <sup>7</sup> | ↓ <sub>min</sub> <sup>7</sup> |
|         | Si     | ↓ <sub>min</sub>  | ↓ <sub>max</sub> | ↓ <sub>min</sub> <sup>8</sup> | ↓ <sub>max</sub> <sup>8</sup> |
| 4       | Ti     | ↑ <sub>min</sub>  | ↓ <sub>max</sub> | ↑ <sub>min</sub> <sup>8</sup> | ↓ <sub>max</sub> <sup>8</sup> |
|         | Zr     | ↓ <sub>min</sub>  | ↓ <sub>min</sub> | ↓ <sub>min</sub> <sup>8</sup> | ↓ <sub>min</sub> <sup>8</sup> |
|         | Sn     | ↓ <sub>min</sub>  | ↓ <sub>max</sub> | ↓ <sub>min</sub> <sup>8</sup> | ↓ <sub>max</sub> <sup>8</sup> |
|         | Pb     | ↓ <sub>max</sub>  | ↓ <sub>max</sub> | -                             | -                             |
|         | V      | ↓ <sub>min</sub>  | ↓ <sub>max</sub> | ↓ <sub>min</sub> <sup>7</sup> | ↓ <sub>max</sub> <sup>7</sup> |
| 5       | Nb     | ↑ <sub>max</sub>  | ↑ <sub>max</sub> | ↑ <sub>max</sub> <sup>7</sup> | ↑ <sub>max</sub> <sup>7</sup> |
|         | Ta     | ↑ <sub>max</sub>  | ↑ <sub>max</sub> | ↑ <sub>max</sub> <sup>7</sup> | ↑ <sub>max</sub> <sup>7</sup> |

Tab. S3 Ionic radius and electronegativity of dopants.

|                   | D <sup>4+</sup> |      | D <sup>2+</sup> |      | D <sup>3+</sup> |      |      |      |      | D <sup>4+</sup> |      |      |      | D <sup>5+</sup> |      |      |
|-------------------|-----------------|------|-----------------|------|-----------------|------|------|------|------|-----------------|------|------|------|-----------------|------|------|
|                   | Hf              | Mg   | Ca              | Sr   | Al              | Y    | La   | Gd   | Si   | Ti              | Zr   | Sn   | Pb   | V               | Nb   | Ta   |
| Ionic radius (Å)  | 0.71            | 0.72 | 1.00            | 1.18 | 0.53            | 0.90 | 1.03 | 0.94 | 0.40 | 0.61            | 0.72 | 0.69 | 0.78 | 0.54            | 0.64 | 0.64 |
| Electronegativity | 1.31            | 1.31 | 1.00            | 0.95 | 1.60            | 1.22 | 1.10 | 1.20 | 1.90 | 1.54            | 1.33 | 1.96 | 1.87 | 1.63            | 1.60 | 1.50 |

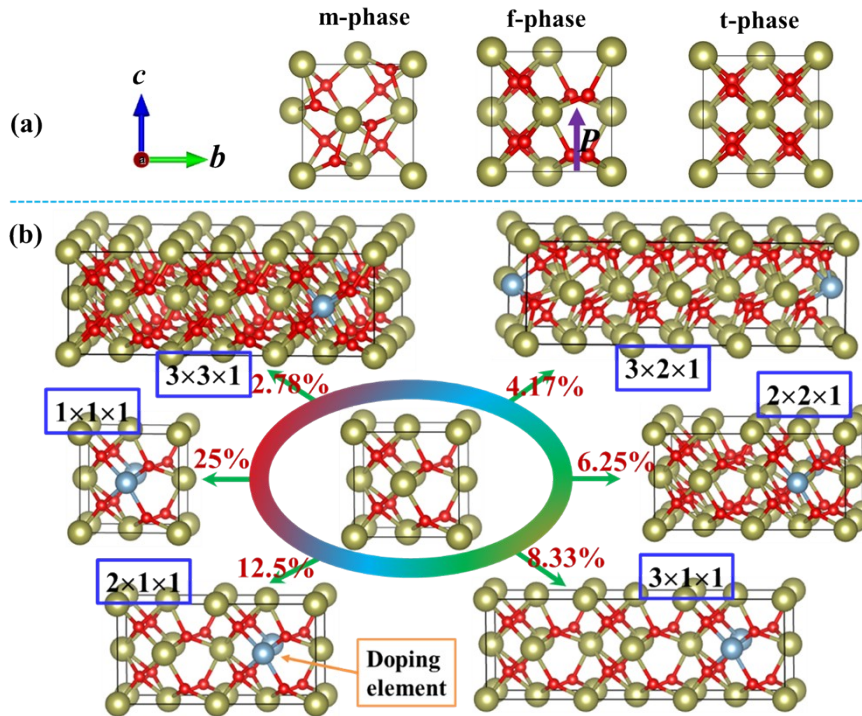

**Fig. S1** (a) Crystal structure of three phases, (b) Different supercell structures constructed based on the f-phase  $\text{HfO}_2$ , and doped  $\text{HfO}_2$  model by doping a dopant in these supercell. This modeling also applies to doped m-phase and doped t-phase.

## 2. Ferroelectric f-phase fraction and magnitude of spontaneous polarization

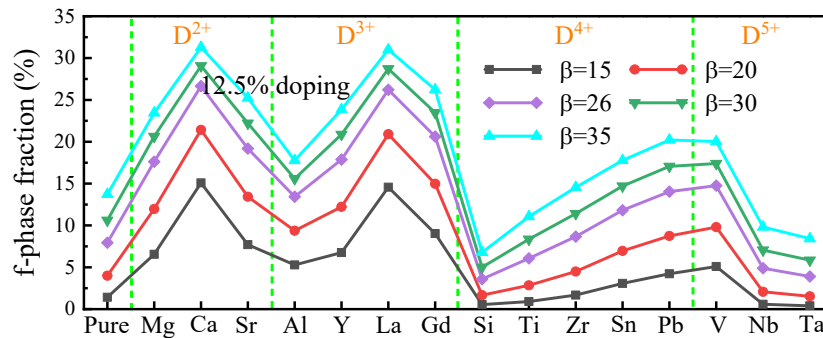

**Fig. S2** The f-phase fractions of  $\text{HfO}_2$  polymorphs in the presence of different dopants under different  $\beta$  values. The valence states of different dopants are separated by green dotted lines.

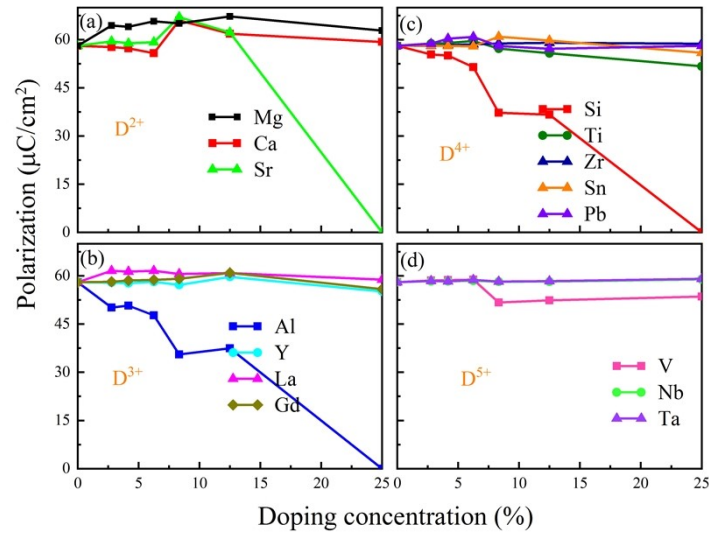

**Fig. S3** Polarization magnitude of doped HfO<sub>2</sub> with (a) D<sup>2+</sup>, (b) D<sup>3+</sup>, (c) D<sup>4+</sup>, and (d) D<sup>5+</sup> elements under different doping concentrations. Once it is difficult to clearly identify the ferroelectric phase morphology during relaxation at higher doping concentrations, we set its polarization magnitude to zero.

### 3. Total phase energy and phase structure transformation under carrier conditions

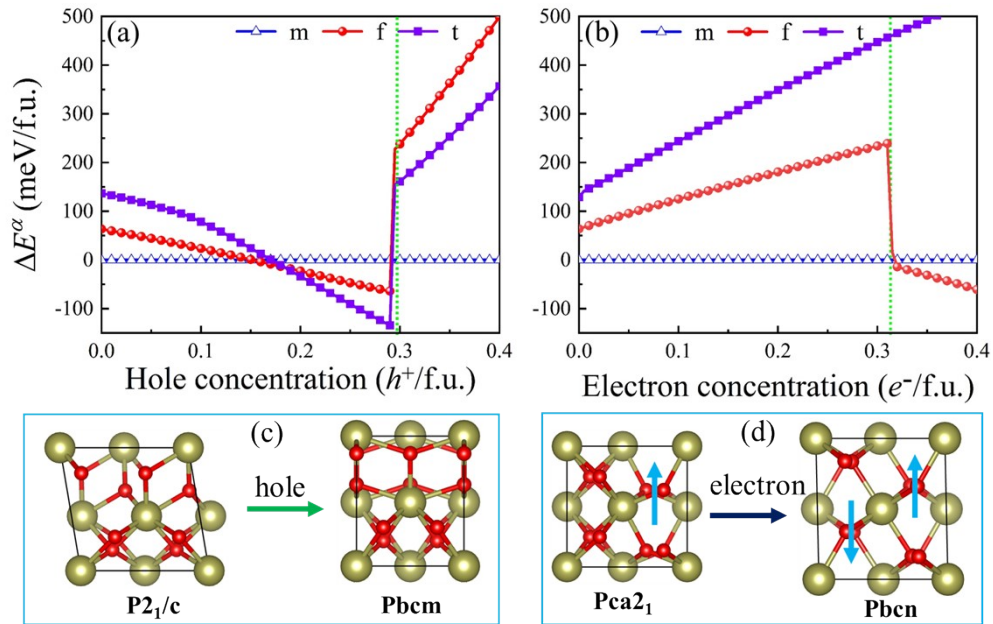

**Fig. S4** Phase energy difference  $\Delta E$  of HfO<sub>2</sub> as a function of hole (a) and electron (b) concentration. The vertical green dashed line indicates that the phase transition occurs at this doping concentration. Phase transition diagram under (c) hole doping and (d) electron doping.

The cyan arrow in the (d) indicates the polarization direction.

**Tab. S4** Phase energy difference  $\Delta E$  between Pca2<sub>1</sub> (Pbcn) phase and P2<sub>1</sub>/c phase under different Ta doping concentrations.

|                                  | Ta concentration = 25% |       | Ta concentration = 50% |        |
|----------------------------------|------------------------|-------|------------------------|--------|
|                                  | Pca2 <sub>1</sub>      | Pbcn  | Pca2 <sub>1</sub>      | Pbcn   |
| $\Delta E^{\alpha-m}$ (meV/f.u.) | 104.23                 | 71.27 | 113.33                 | -13.39 |

#### 4. DOS and 3D charge density distribution of phase with different dopants

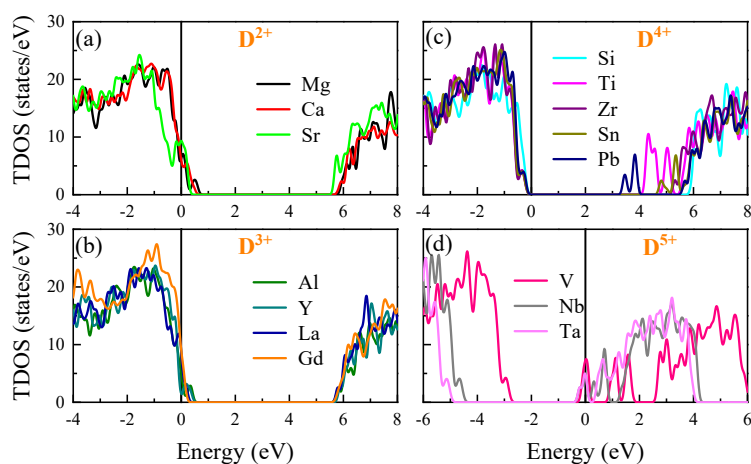

**Fig. S5** The total density of state (TDOS) of the (a) D<sup>2+</sup>, (b) D<sup>3+</sup>, (c) D<sup>4+</sup>, (d) D<sup>5+</sup> elements doped m-phase HfO<sub>2</sub> with doping concentration of 12.5% using HSE06 hybrid functional. The zero of energy represents the Fermi level in this and subsequent DOS.

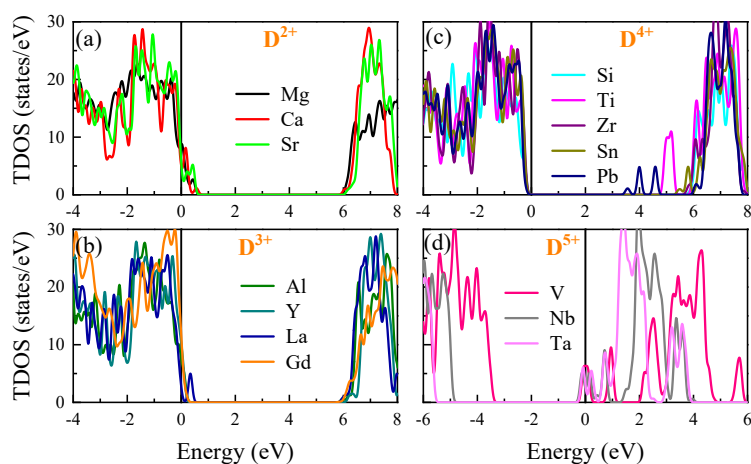

**Fig. S6** The TDOS of the (a) D<sup>2+</sup>, (b) D<sup>3+</sup>, (c) D<sup>4+</sup>, and (d) D<sup>5+</sup> element doped t-phase HfO<sub>2</sub> with doping concentration of 12.5% using HSE06 hybrid functional.

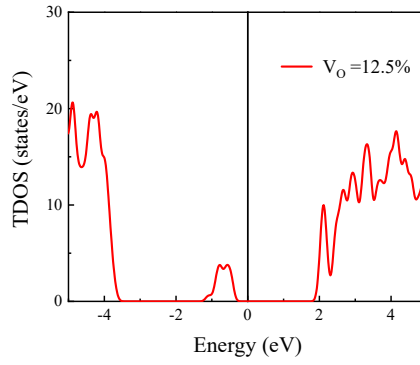

**Fig. S7** The TDOS of the f-phase  $\text{HfO}_2$  with oxygen vacancies concentration of 12.5% using HSE06 hybrid functional.

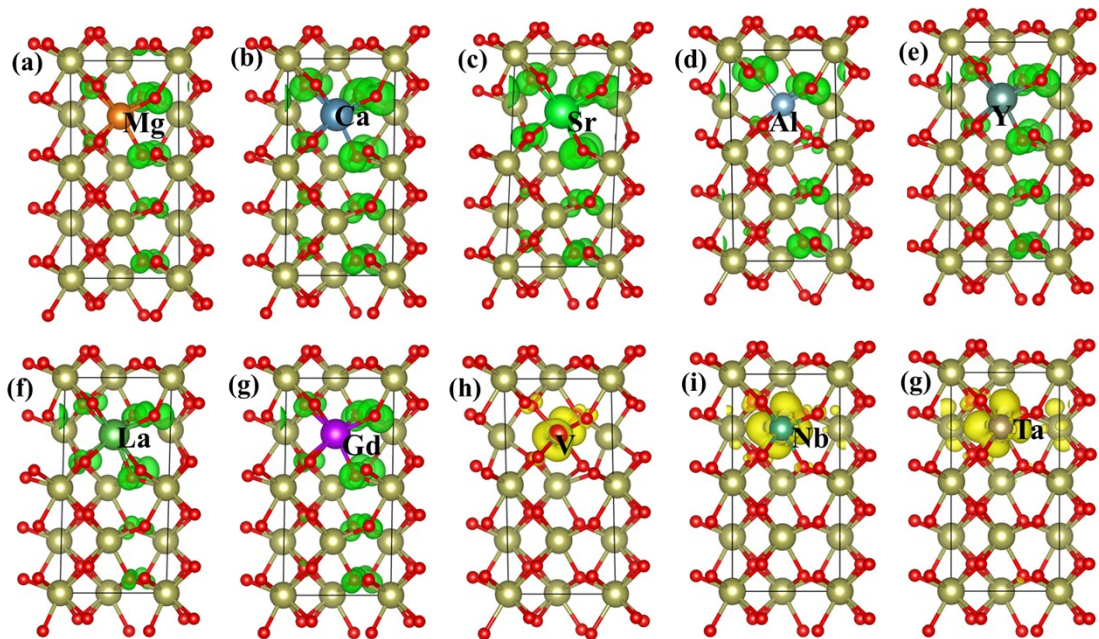

**Fig. S8** The 3D charge density projected on bands forming the metallic states in the doped f-phase  $\text{HfO}_2$  with doping concentration of 12.5%. (a) Ca, (b) Sr, (c) Ba, (d) Al, (e) Y, (f) La, (g) Gd, (h) V, (i) Nb, (g) Ta. The energy range of 3D charge density in the V, Nb, and Ta-doped  $\text{HfO}_2$  is  $[-1, 0]$ , while the energy range of other doped  $\text{HfO}_2$  is  $[0, 1]$ . Therefore, the holes and electrons are depicted by green and yellow isosurfaces, respectively.

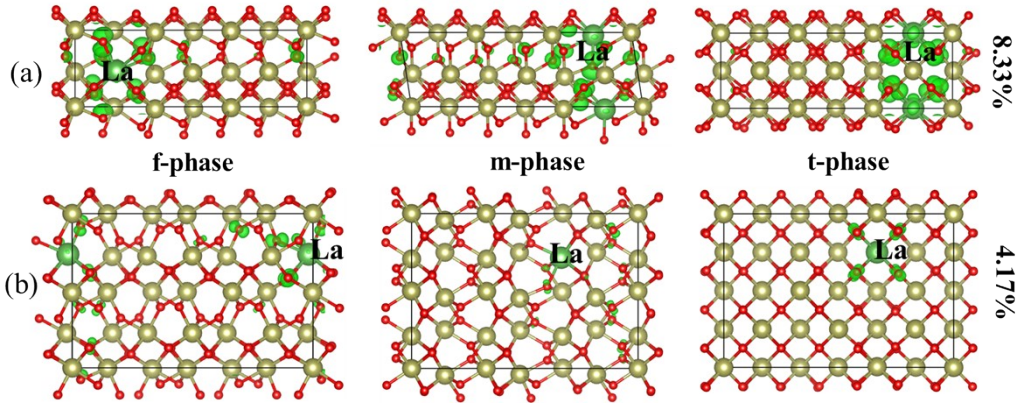

**Fig. S9** The 3D charge density distribution of La-doped HfO<sub>2</sub> in different phases with a doping concentration of (a) 8.33% and (b) 4.17%.

### 5. Phase stability and phase fraction of Ca@2V, Ca@V<sub>O</sub>, and La@V<sub>O</sub> systems

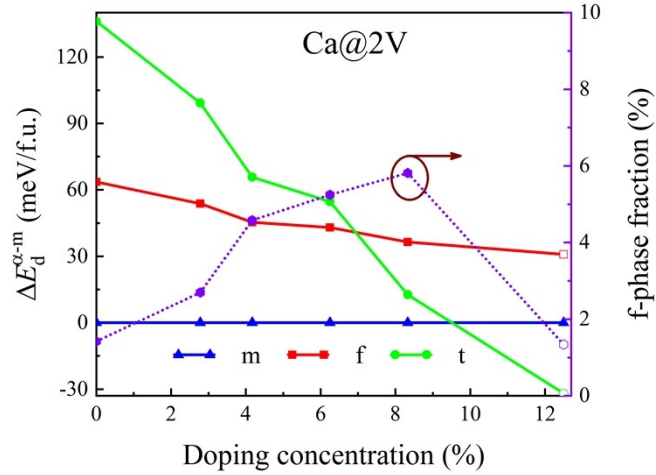

**Fig. S10** Phase energy difference  $\Delta E_d$  of Ca@2V co-doped HfO<sub>2</sub> and the f-phase fraction as a function of doping concentration. To achieve electrical neutrality within the system, two V atoms are needed for each Ca atom. Although the phases mostly retained their structural characteristics (solid symbols) upon doping, at higher doping concentrations, it is difficult to clearly identify the doping phase structure after relaxation, which is indicated by open symbols.

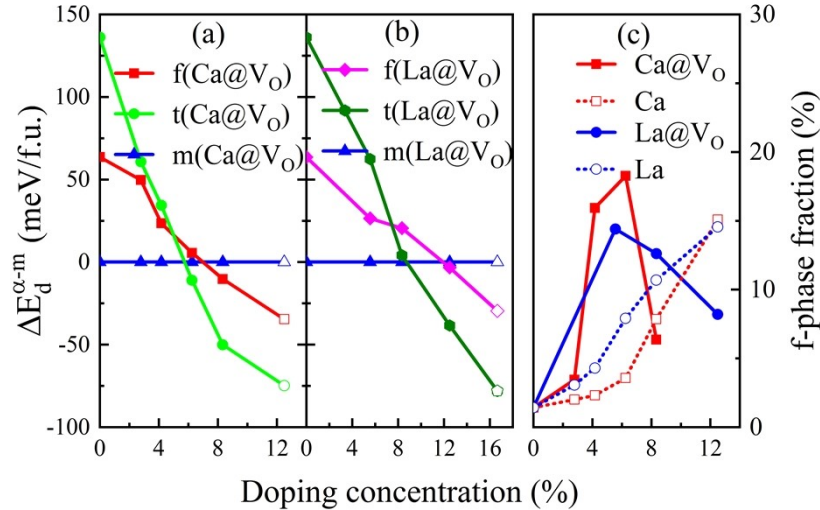

**Fig. S11** Phase total energy difference  $\Delta E_d$  of (a) Ca@V<sub>O</sub> and (b) La@V<sub>O</sub> co-doped HfO<sub>2</sub> and their f-phase fraction (c) as a function of doping concentration. In which the f-phase fraction of single element Ca and La-doped HfO<sub>2</sub> are used for comparison. Although the phases mostly retained their structural characteristics (solid symbols) upon doping in (a) and (b), at higher doping concentrations, it is difficult to clearly identify the doping phase structure after relaxation, which is indicated by open symbols.

## References

- 1 M. Dogan, N. Gong, T. P. Ma and S. Ismail-Beigi, *Phys. Chem. Chem. Phys.*, 2019, **21**, 12150.
- 2 I. MacLaren, T. Ras, M. MacKenzie, A. J. Craven, D. W. McComb and S. De Gendt, *J. Electrochem. Soc.*, 2009, **156**, G103.
- 3 R. Ruh and P. W. R. Corfield, *J. Am. Ceram. Soc.*, 1970, **53**, 126.
- 4 E. D. Grimley, T. Schenk, T. Mikolajick and J. M. LeBeau. *Adv. Mater. Interfaces*, 2018, **5**, 1701258.
- 5 R. Materlik, Technische Universität Dresden, 2019.
- 6 R. Materlik, C. Kunneth, M. Falkowski, T. Mikolajick, and Alfred Kersch, *J. Appl. Phys.*, 2018, **123**, 164101.
- 7 R. Batra, T. D. Huan, G. A. Rossetti, Jr., and R. Ramprasad, *Chem. Mater.*, 2017, **29**, 9102.
- 8 C. Kunneth, R. Materlik, M. Falkowski, and A. Kersch, *ACS Appl. Nano Mater.*, 2018, **1**, 254.
